# Supplementary material
Source: MDPI journal article supplement (https://www.mdpi.com/2076-3417/11/22/10830)
Supplement: s1 [file s1 › applsci-1376740-supplementary.pdf]

### Supplementary materials

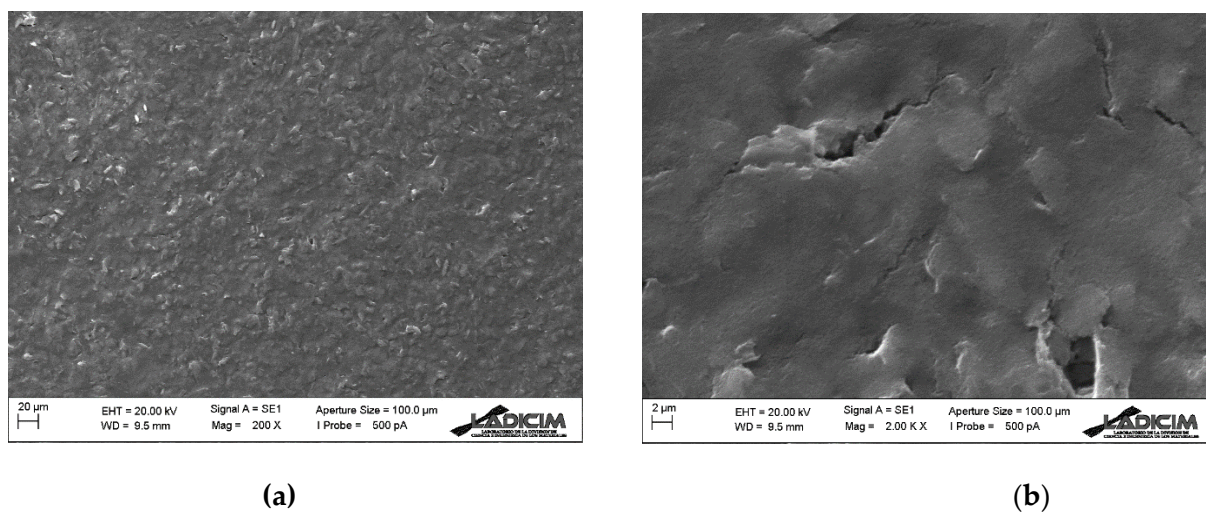

**Figure S1.** SEM image of carbon screen printed microelectrodes. (a) 200x. (b) 2000x

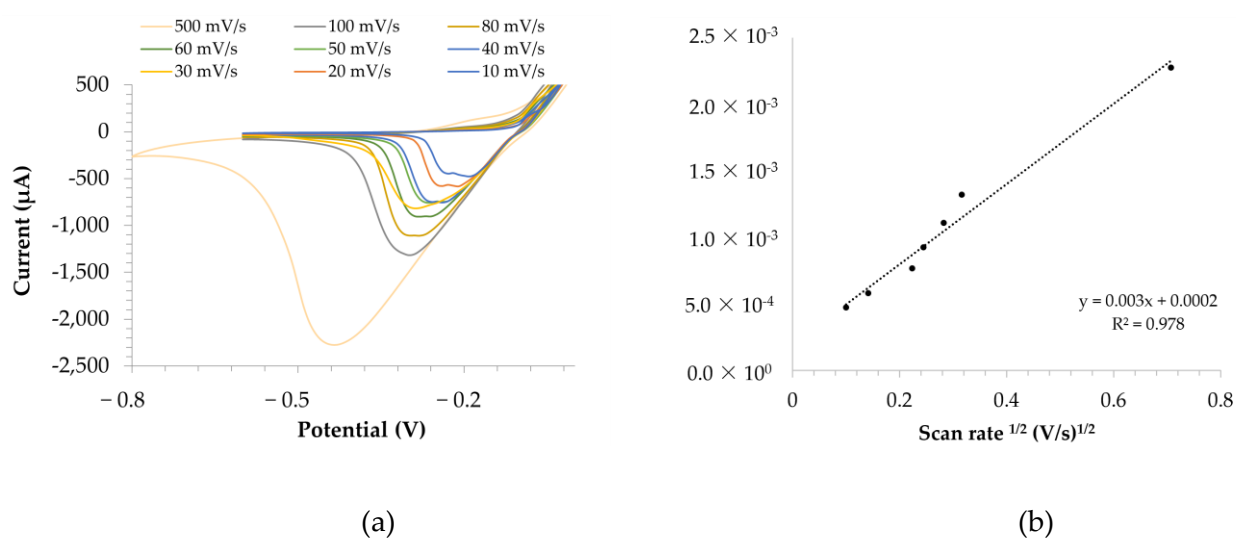

**Figure S2.** Active area calculation for copper based electrode (a) Cyclic voltammetry with 5 mM  $\text{Cl}_3[\text{Ru}(\text{NH}_3)_6]$  in 0.1 M KCl with a scan rate from 500 to 10  $\text{mV s}^{-1}$ . (b) Randles-Equation linear regression.

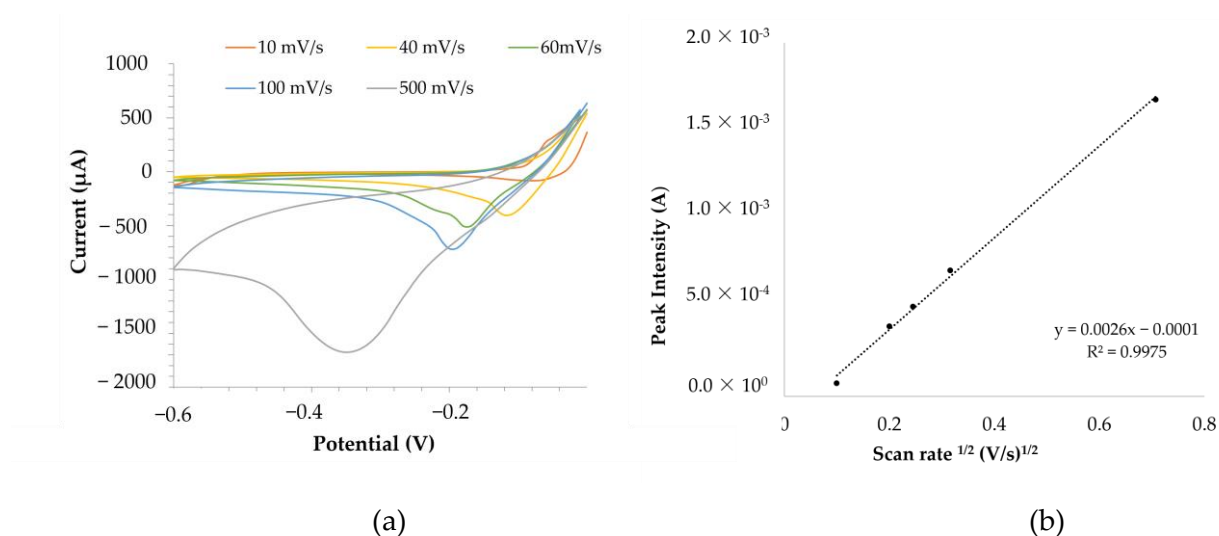

**Figure S3.** Active area calculation for copper oxide based electrode (a) Cyclic voltammetry with 5 mM  $\text{Cl}_3[\text{Ru}(\text{NH}_3)_6]$  in 0.1 M KCl with a scan rate from 500 to 10 mV  $\text{s}^{-1}$ . (b) Randles-Equation linear regression.

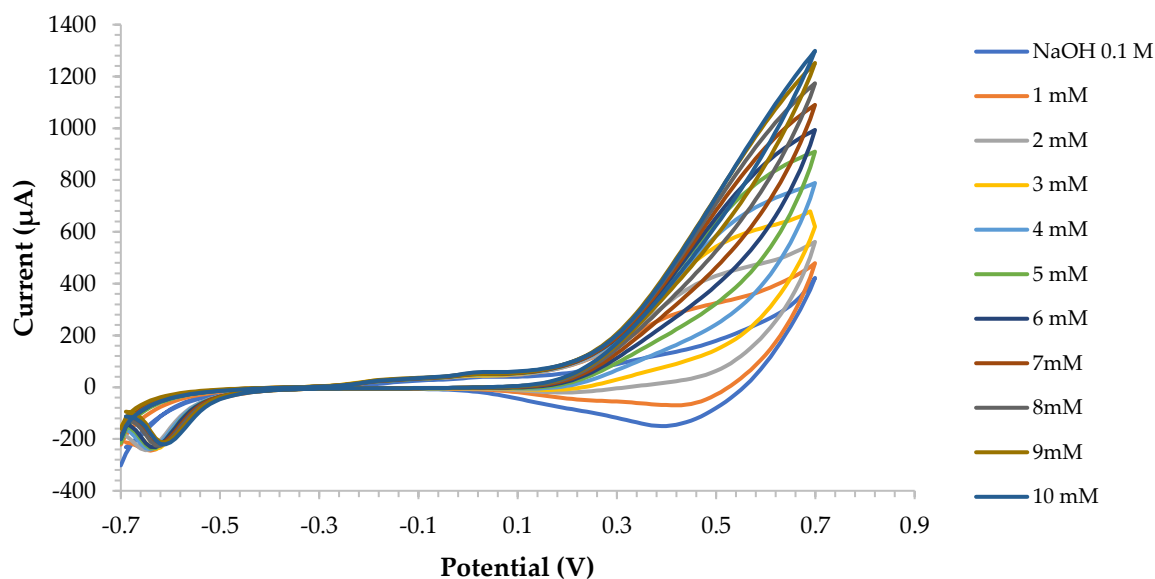

**Figure S4.** Copper oxide electrode cyclic voltammetry curves (1 cycle, -0.7 to +0.7 V vs Ag/AgCl) with different glucose concentrations in 0.1M NaOH.
